# Supplementary material
Source: PubMed Central journal article supplement (PMC10308297)
Supplement: jamasurg-e232279-s002.pdf [file jamasurg-e232279-s002.pdf]

\*Indicates required information. Only first name, last name, and suffix will appear in PubMed.

| <b>*Group Name(s): European Consortium on Minimally Invasive Pancreatic Surgery (E-MIPS)</b> |                   |                              |                  |                                                                                                                         |                                          |                                                         |                                                                                            |
|----------------------------------------------------------------------------------------------|-------------------|------------------------------|------------------|-------------------------------------------------------------------------------------------------------------------------|------------------------------------------|---------------------------------------------------------|--------------------------------------------------------------------------------------------|
| <b>*First Name and Middle Initial(s)</b>                                                     | <b>*Last Name</b> | <b>*Suffix (eg, Jr, III)</b> | Academic Degrees | Institution                                                                                                             | Location (city, state/province, country) | Role or Contribution, eg, chair, principal investigator | Group (if more than 1 Group listed in the byline) and/or Subgroup (eg, Steering Committee) |
| Coen                                                                                         | van Dam           |                              | MD               | Department of Surgery, Erasmus MC Cancer Institute                                                                      | Rotterdam, the Netherlands               | Data collection                                         |                                                                                            |
| Daniele                                                                                      | Ferraro           |                              | MD               | Division of Surgery and Interventional Science, Royal Free London NHS Foundation Trust                                  | London, United Kingdom                   | Data collection                                         |                                                                                            |
| Jeremy                                                                                       | French            |                              | MD               | Department of Surgery, The Newcastle upon Tyne Hospitals NHS Foundation Trust                                           | Newcastle, United Kingdom                | Data collection                                         |                                                                                            |
| Isabella                                                                                     | Frigerio          |                              | MD               | Department of Surgery, Pederzoli Hospital                                                                               | Peschiera, Italy                         | Data collection                                         |                                                                                            |
| Cristians A                                                                                  | Gonzalez          |                              | MD               | Department of Viscerale and Digestive Surgery, Nouvel Hôpital Civil - IHU-Strasbourg, Institute of Image-Guided Surgery | Strasbourg, France                       | Data collection                                         |                                                                                            |
| Mohammed                                                                                     | Hammoda           |                              | MD               | Department of Surgery, Morrison Hospital                                                                                | Swansea, United Kingdom                  | Data collection                                         |                                                                                            |
| Rugved                                                                                       | Kulkarni          |                              | MD               | Department of Surgery, Queen Elizabeth Hospital, University Hospitals of Birmingham NHS Trust                           | Birmingham, United Kingdom               | Data collection                                         |                                                                                            |
| Michele                                                                                      | Mazzola           |                              | MD               | Department of Oncologic and Minimally Invasive Surgery, ASST Grande Ospedale Metropolitano Niguarda                     | Milan, Italy                             | Data collection                                         |                                                                                            |
| Niccolò                                                                                      | Napoli            |                              | MD               | Division of General and Transplant surgery, University of Pisa                                                          | Pisa, Italy                              | Data collection                                         |                                                                                            |
| Matteo                                                                                       | de Pastena        |                              | MD               | Department of General and Pancreatic Surgery, Pancreas Institute, Verona University Hospital                            | Verona, Italy                            | Data collection                                         |                                                                                            |
| Claudio                                                                                      | Ricci             |                              | MD               | Department of Surgery, S. Orsola-Malpighi Hospital                                                                      | Bologna, Italy                           | Data collection                                         |                                                                                            |
| Gianluca                                                                                     | Rompianesi        |                              | MD               | Department of Surgery, Oxford University Hospital NHS Foundation Trust                                                  | Oxford, United Kingdom                   | Data collection                                         |                                                                                            |

## Supplemental Online Content: Nonauthor Collaborators

\*Indicates required information. Only first name, last name, and suffix will appear in PubMed.

| *First Name and Middle Initial(s) | *Last Name | *Suffix (eg, Jr, III) | Academic Degrees | Institution                                                                                                                            | Location (city, state/province, country) | Role or Contribution, eg, chair, principal investigator | Group (if more than 1 Group listed in the byline) and/or Subgroup (eg, Steering Committee) |
|-----------------------------------|------------|-----------------------|------------------|----------------------------------------------------------------------------------------------------------------------------------------|------------------------------------------|---------------------------------------------------------|--------------------------------------------------------------------------------------------|
| Mushegh A.                        | Sahakyan   |                       | MD               | The Intervention Center and Department of HPB Surgery, Oslo University Hospital and Institute of Clinical Medicine, University of Oslo | Oslo, Norway                             | Data collection                                         |                                                                                            |
| Robert                            | Sutcliffe  |                       | MD               | Department of Surgery, Queen Elizabeth Hospital, University Hospitals of Birmingham NHS Trust                                          | Birmingham, United Kingdom               | Data collection                                         |                                                                                            |
| Tole                              | Tholfson   |                       | MD               | The Intervention Center and                                                                                                            | Oslo, Norway                             | Data collection                                         |                                                                                            |
| Patricia                          | Sanchez-   |                       | MD               | Department of Surgery, Hospital del                                                                                                    | Barcelona, Spain                         | Data collection                                         |                                                                                            |
| Ulrich                            | Wellner    |                       | MD               | Department of Surgery, University Medical Centre Schleswig-Holstein, Campus Lübeck                                                     | Lübeck, Germany                          | Data collection                                         |                                                                                            |
