# Supplementary material
Source: PubMed Central journal article supplement (PMC10308297)
Supplement: jamasurg-e232279-s003.pdf [file jamasurg-e232279-s003.pdf]

## Data Sharing Statement

Lof. Learning Curves of Minimally Invasive Distal Pancreatectomy in Experienced Pancreatic Centers. *JAMA Surg.* Published June 28, 2023. doi:10.1001/jamasurg.2023.2279

### Data

**Data available:** Yes

**Data types:** Other (please specify)

**Additional Information:** Data is available upon request

**How to access data:** [m.g.besselink@amsterdamumc.nl](mailto:m.g.besselink@amsterdamumc.nl) Or <http://www.e-mips.com/new-study-proposals>

**When available:** beginning date: 01-01-2024

### Supporting Documents

**Document types:** None

### Additional Information

**Who can access the data:** researchers whose proposed use of the data has been approved

**Types of analyses:** analyses in line with the goals of [www.e-mips.com](http://www.e-mips.com)

**Mechanisms of data availability:** After approval of a proposal <http://www.e-mips.com/new-study-proposals>
